# Supplementary material for: Secondary causal mediation analysis of a pragmatic clinical trial to evaluate the effect of chiropractic care for US active-duty military on biopsychosocial outcomes occurring through effects on low back pain interference and intensity
Source: PubMed Central journal article supplement — BMJ Open. 2024 Nov 19;14(11):e083509. doi: 10.1136/bmjopen-2023-083509 (PMC11580239; doi:10.1136/bmjopen-2023-083509), 2024-11-19
Supplement: bmjopen-14-11-s001.pdf [file bmjopen-14-11-s001.pdf]

Supplemental Appendix

Table S1. Description of outcome and select covariate measurements[18]

| Variable name (modeled)                     | Scale                     | Recall Period | Questions                                                                                                                                                                                                                                                                                       | Response Options                                                                                                            |
|---------------------------------------------|---------------------------|---------------|-------------------------------------------------------------------------------------------------------------------------------------------------------------------------------------------------------------------------------------------------------------------------------------------------|-----------------------------------------------------------------------------------------------------------------------------|
| Pain interference (mediator)                | Likert (1-5)              | 7 days        | “How much did pain interfere with your day-to-day activities?”, “How much did pain interfere with work around the home?”, “How much did pain interfere with your ability to participate in social activities?”, “How much did pain interfere with your household chores?”                       | “Not at all”, “A little bit”, “Somewhat”, “Quite a bit”, “Very much”                                                        |
| Pain intensity (mediator)                   | 0-10                      | 7 days        | Rate your pain on average                                                                                                                                                                                                                                                                       | 0 (no pain) to 10 (worst imaginable pain)                                                                                   |
| Sleep disturbance[18] (outcome)             | Likert (1-5)              | 7 days        | “My sleep quality was...”                                                                                                                                                                                                                                                                       | “Very poor”, “Poor”, “Fair”, “Good”, “Very good”                                                                            |
|                                             | Likert (1-5)              | 7 days        | “My sleep was refreshing”, “I had a problem with my sleep”, “I had difficulty falling asleep”                                                                                                                                                                                                   | “Not at all”, “A little bit”, “Somewhat”, “Quite a bit”, “Very much”                                                        |
| Satisfaction with social roles (outcome)    | Likert (1-5)              | 7 days        | “I am satisfied with how much work I can do (including work at home)”, “I am satisfied with my ability to work (including work at home)”, “I am satisfied with my ability to do regular personal and household responsibilities”, “I am satisfied with my ability to perform my daily routines” | “Not at all”, “A little bit”, “Somewhat”, “Quite a bit”, “Very much”                                                        |
| Sex (baseline covariate)                    | Binary                    | None          |                                                                                                                                                                                                                                                                                                 | Male, Female                                                                                                                |
| Low back pain duration (baseline covariate) | Ordinal Categorical (1-7) |               | How long ago did your current episode of low back pain begin?                                                                                                                                                                                                                                   | “Less than 7 days ago”, “7 days to less than 16 days ago”, “16 days to less than 1 month ago”, “1-3 months ago”, “More than |

|  |  |  |  |                                                                                                |
|--|--|--|--|------------------------------------------------------------------------------------------------|
|  |  |  |  | 3 months and less than 6 months ago", "6 months to less than 1 year ago", "1 year or more ago" |
|--|--|--|--|------------------------------------------------------------------------------------------------|

Table S2. Completeness of outcome and mediator data

| Variable name (modeled)      | Time point | UMC, n=375, n (%) | UMC+CC, n=375, n (%) | Total, n=750, n (%) |
|------------------------------|------------|-------------------|----------------------|---------------------|
| Pain interference (mediator) | 6 weeks    | 316 (84.3)        | 321 (85.6)           | 637 (84.9)          |
| Pain intensity (mediator)    | 6 weeks    | 315 (84.0)        | 321 (85.6)           | 636 (84.8)          |
| Physical function (outcome)  | 12 weeks   | 288 (76.8)        | 287 (76.5)           | 575 (76.7)          |
| Sleep disturbance (outcome)  | 12 weeks   | 288 (76.8)        | 287 (76.5)           | 575 (76.7)          |
| Fatigue (outcome)            | 12 weeks   | 288 (76.8)        | 287 (76.5)           | 575 (76.7)          |
| Social roles (outcome)       | 12 weeks   | 288 (76.8)        | 287 (76.5)           | 575 (76.7)          |

UMC: usual medical care; UMC+CC: usual medical care plus chiropractic care
